# Supplementary material
Source: PubMed Central journal article supplement (PMC11102597)
Supplement: NIHMS1988508-supplement-3.pdf [file NIHMS1988508-supplement-3.pdf]

## Supplemental Information

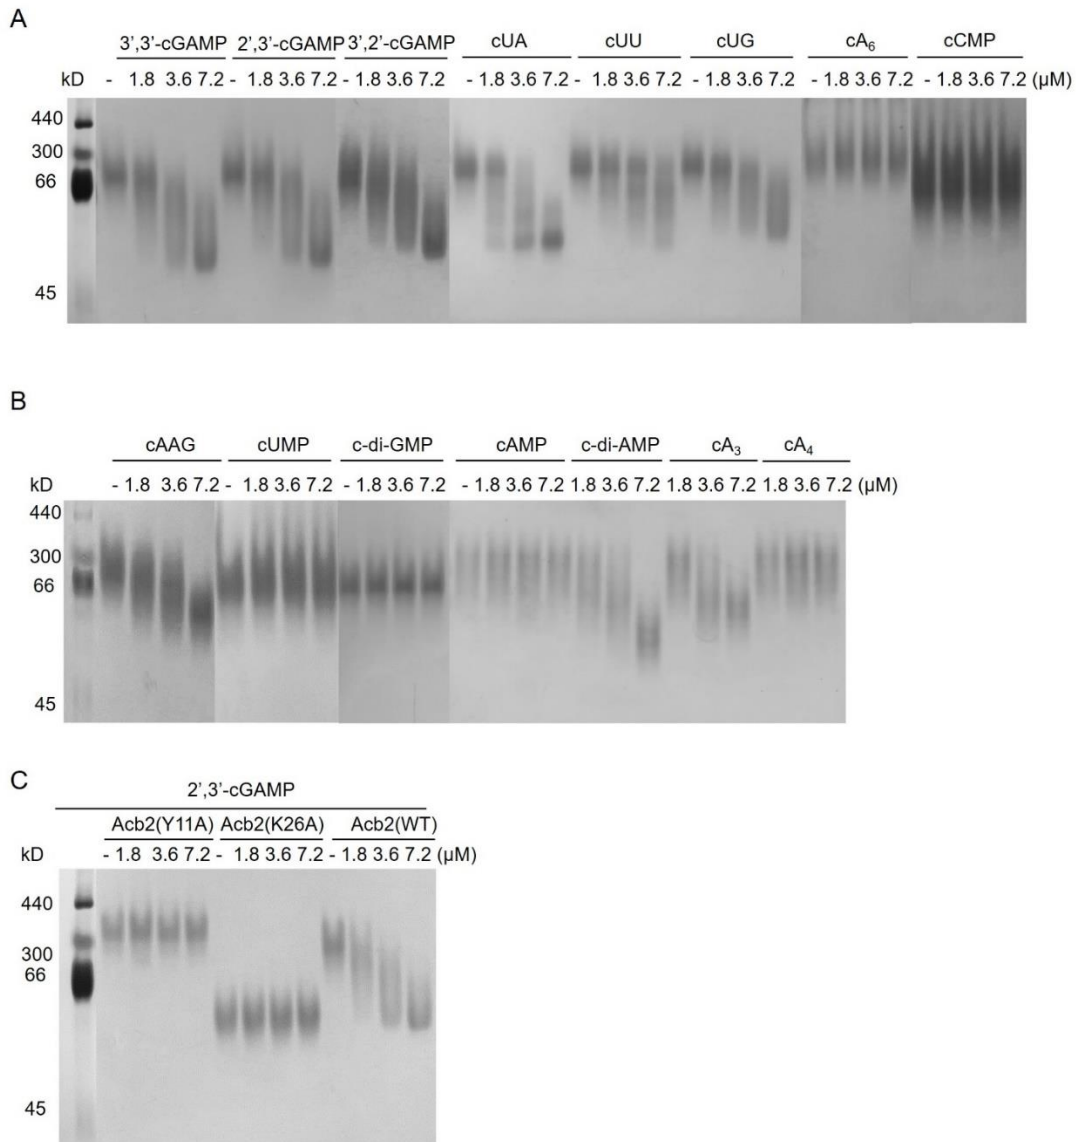

846

847

**Figure S1. The cyclic nucleotide binding spectrum of PaMx33-Acb2, related to Figures 1 and 2**

848

(A-C) Native PAGE assay showed the binding of PaMx33-Acb2 and its mutants to cyclic nucleotides.

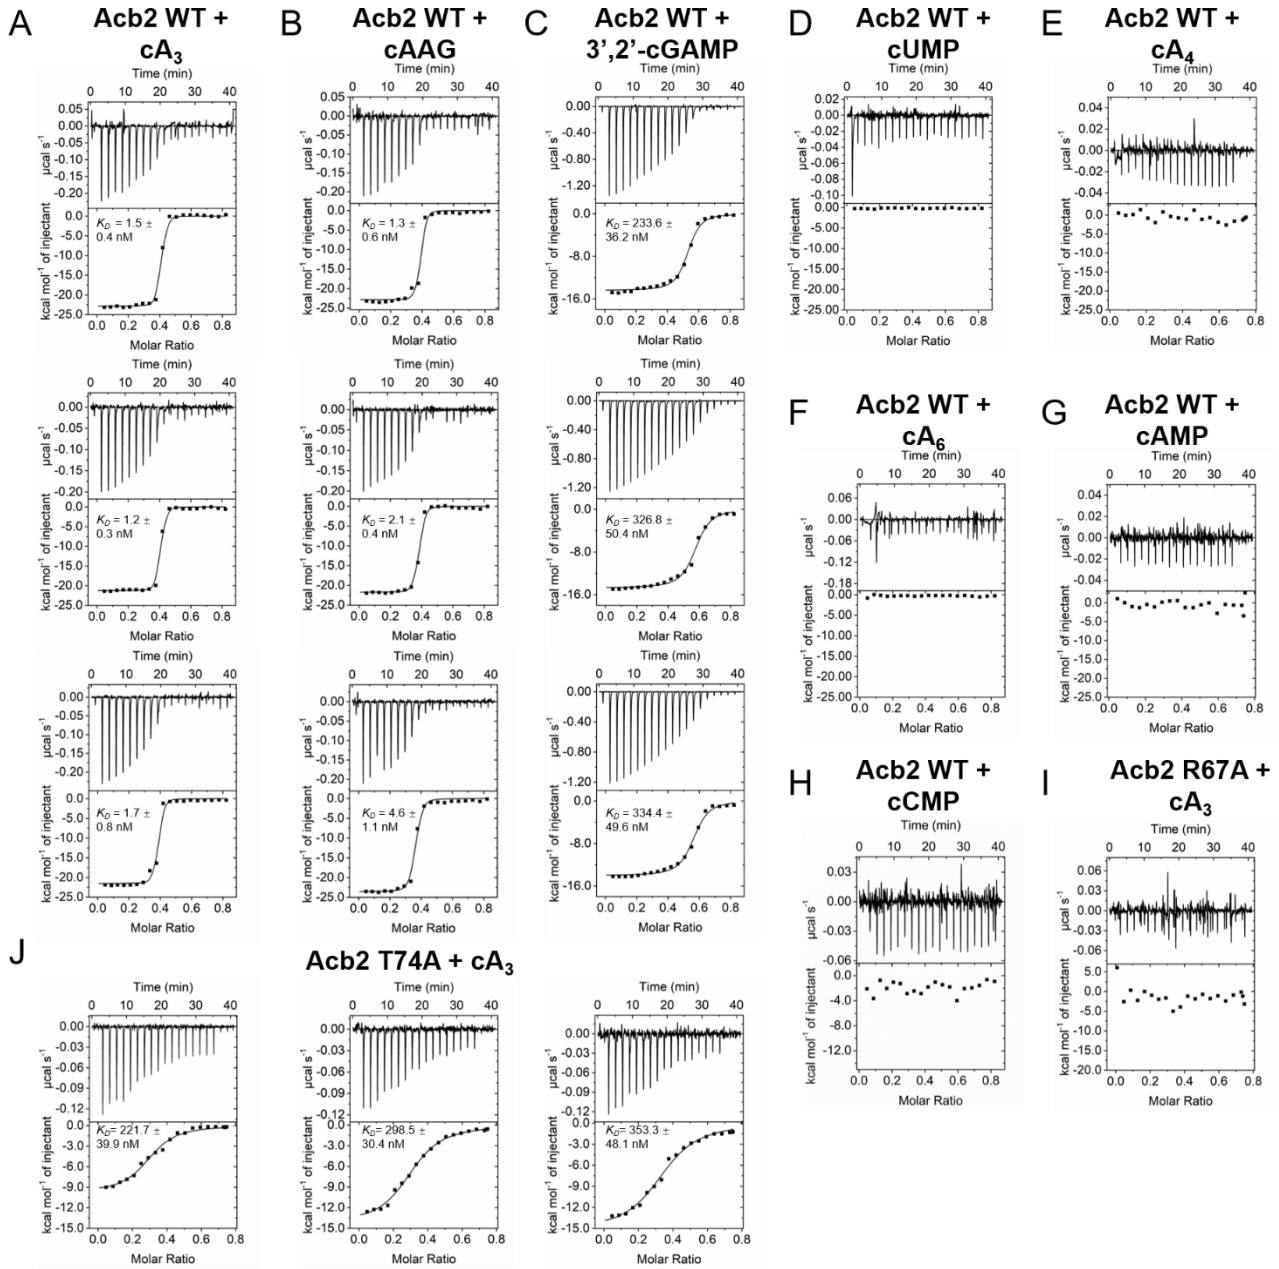

849

850 **Figure S2. The binding spectrum of PaMx33-Acb2 studied by ITC assays, related to Figures 1**  
 851 **and 2**

852 (A-H) ITC assays to test binding of PaMx33-Acb2 to cyclic nucleotides.

853 (I-J) ITC assays to test binding of cA<sub>3</sub> to PaMx33-Acb2 T74A and PaMx33-Acb2 R67A.

854

855

856

857

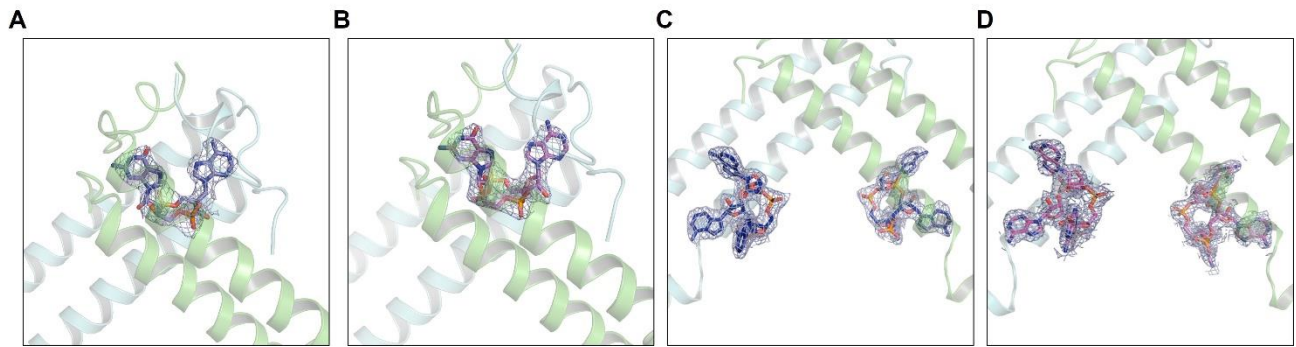

858

859 **Figure S3. Density map of bound nucleotides in the structures of this study, related to Figures 1**  
 860 **and 2**

861 2Fo-Fc electron density of 3',2'-cGAMP, 2',3'-cGAMP, cA<sub>3</sub> and cAAG within the structures of Acb2-  
 862 3',2'-cGAMP, Acb2-2',3'-cGAMP, Acb2-cA<sub>3</sub> and Acb2-cAAG contoured at 1  $\sigma$ , respectively.

863

864

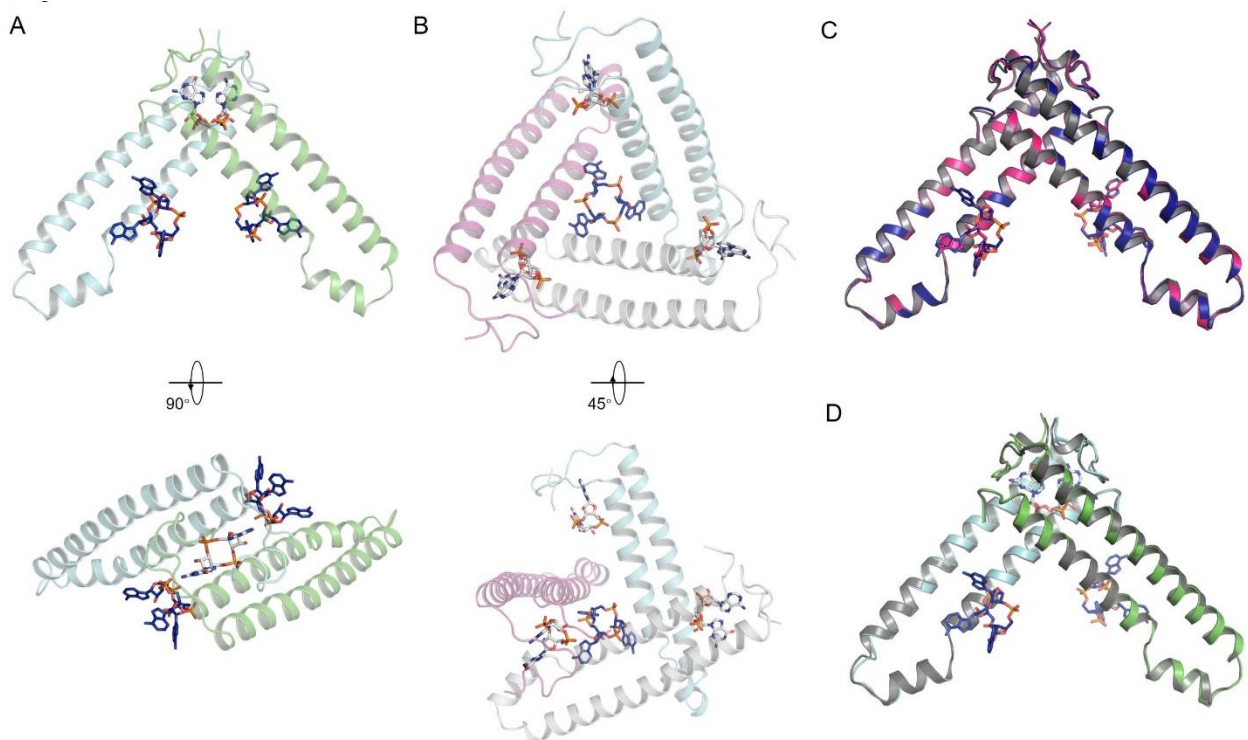

865

866 **Figure S4. The binding sites of cyclic trinucleotides and dinucleotides are different, related to**  
 867 **Figure 2**

868 (A) An Acb2 dimer and the bound 3',3'-cGAMP within the Acb2-3',3'-cGAMP structure is shown.

869 The Acb2-cA<sub>3</sub> structure is aligned to the structure and only the two cA<sub>3</sub> molecules are shown.

870 (B) An Acb2 trimer and the bound cA<sub>3</sub> within the Acb2-cA<sub>3</sub> structure is shown. The Acb2-3',3'-

871 cGAMP structure is aligned to the structure and only the three 3',3'-cGAMP molecules are shown.  
872 (C) Structural superimposition among Acb2-cA<sub>3</sub> (colored deep blue), Acb2-cAAG (colored hot pink)  
873 and apo Acb2 (colored grey) structures. Only an Acb2 dimer and the cyclic trinucleotides it is binding  
874 are shown.  
875 (D) Structural superimposition between Acb2-cA<sub>3</sub>-3',3'-cGAMP and apo Acb2 structures. Only an  
876 Acb2 dimer and the cyclic nucleotides it is binding are shown.

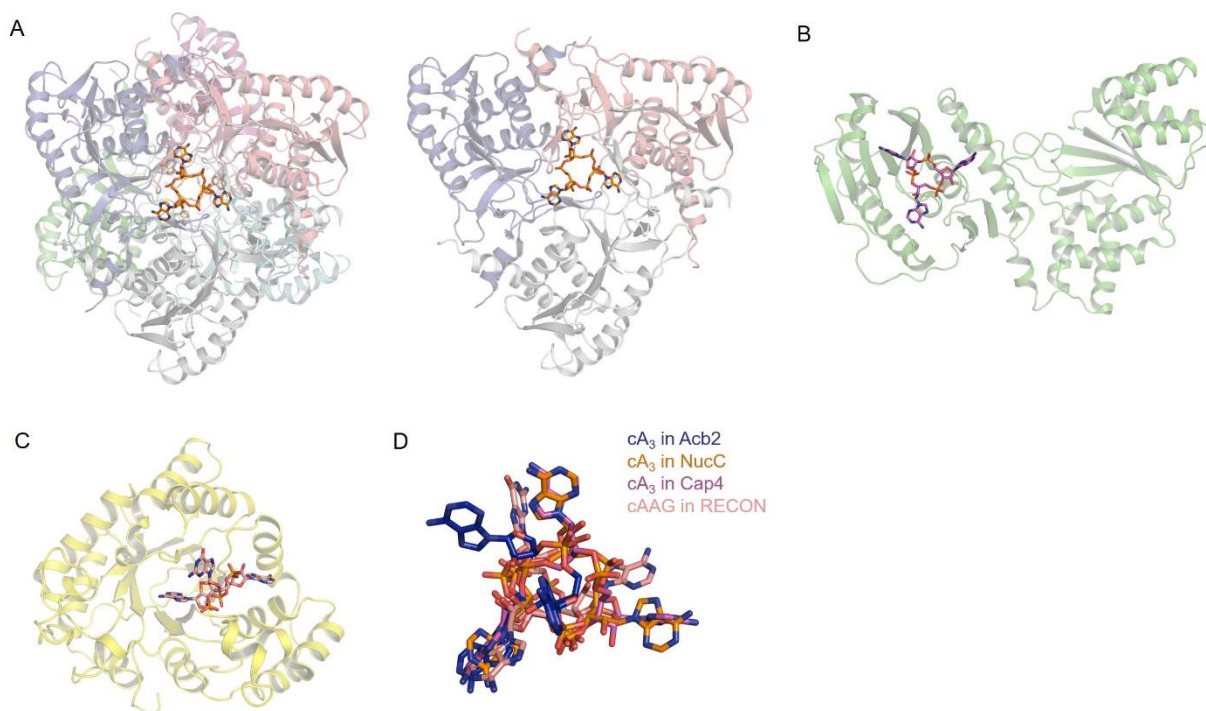

877  
878 **Figure S5. Acb2 binds to cA<sub>3</sub> with a novel fold, related to Figure 3**  
879 (A) The binding of cA<sub>3</sub> in NucC from *Escherichia coli* (PDB code: 6P1H). A NucC hexamer bound  
880 with two cA<sub>3</sub> molecules and a NucC trimer bound with one cA<sub>3</sub> molecule are shown in the left and  
881 right, respectively.  
882 (B) The binding of cA<sub>3</sub> in Cap4 from *Acinetobacter baumannii* (PDB code: 6WAN).  
883 (C) The binding of cAAG in RECON from *Mus musculus* (PDB code: 6M7K).  
884 (D) cA<sub>3</sub> and cAAG molecules in the structures of Acb2-cA<sub>3</sub>, NucC-cA<sub>3</sub>, Cap-cA<sub>3</sub> and RECON-cAAG  
885 are aligned together and highlighted.

886

887

888

Tree scale: 1

CDN and CTN binding  
CDN binding (mutant R/T residues)  
CTN binding (mutant Y/K residues)

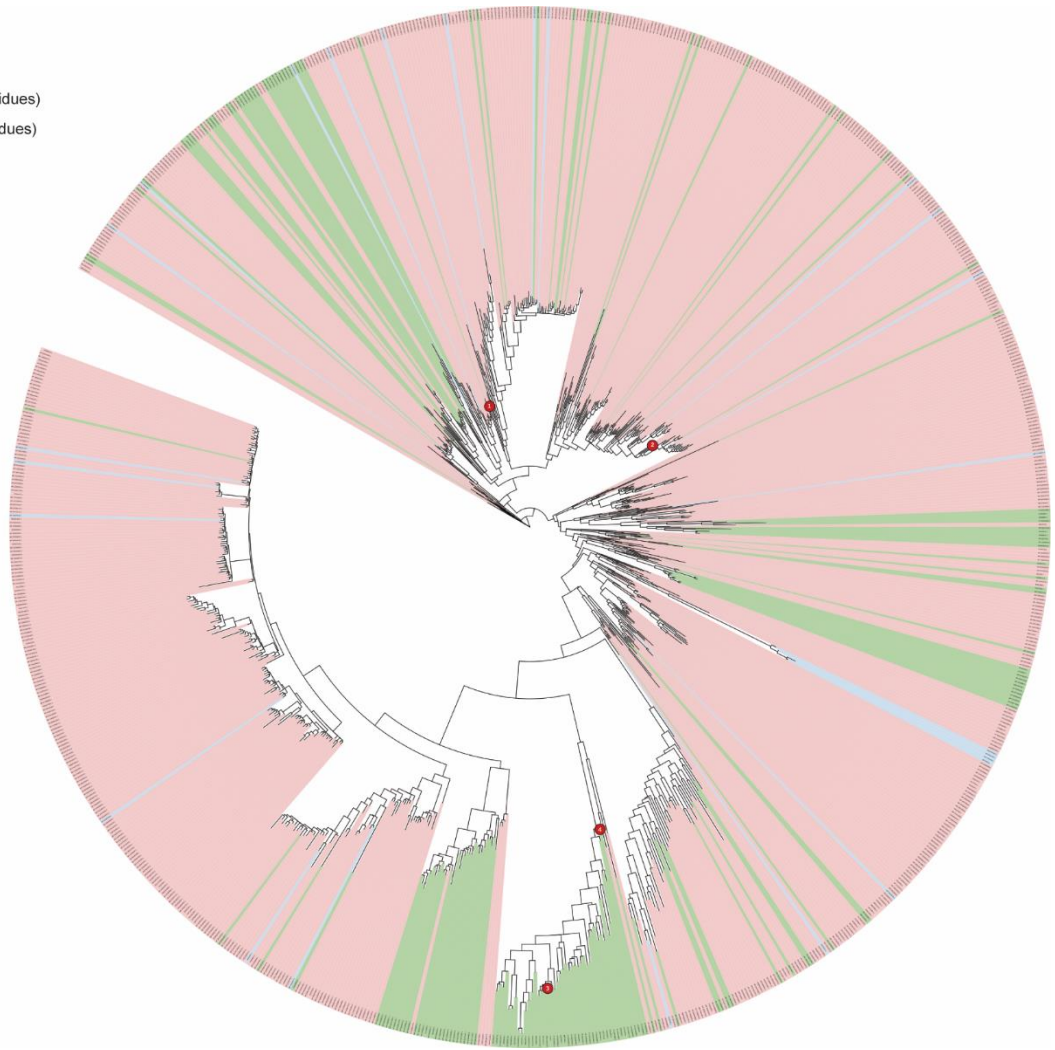

889

890 **Figure S6. Phylogenetic analysis of unique Acb2 homologs across the genomes of prokaryotes and**  
891 **prokaryotic viruses, related to Figures 4 and 5.**

892 Phylogenetic tree of all 878 unique Acb2 protein sequences and classified based on the ability of Acb2  
893 to accommodate CDN and CTN sequences. Branches denoted with the red circles were studied in vitro  
894 and/or in vivo: (1) *P. aeruginosa* phage PaMx33, (2) *P. aeruginosa* phage JBD67, (3) *E. coli* phage T4,  
895 (4) *Serratia* phage CHI14.

896

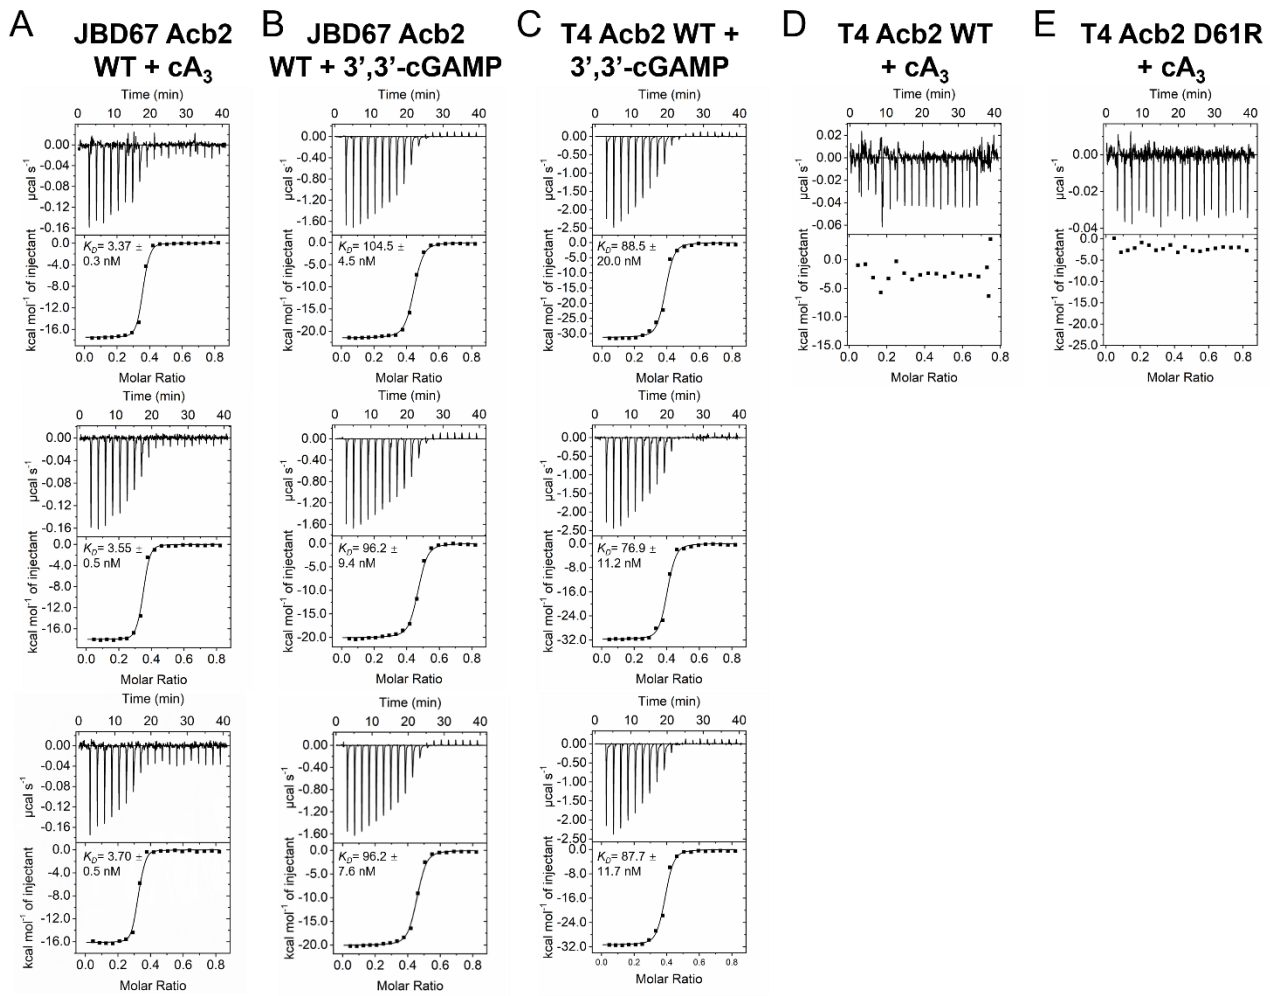

897

898 **Figure S7. The binding spectrums of JBD67-Acb2 and T4-Acb2 studied by ITC assays, related**

899 **to Figure 4**

900 (A-B) ITC assays to test binding of cyclic oligonucleotides to JBD67-Acb2.

901 (C-D) ITC assays to test binding of 3',3'-cGAMP to T4-Acb2.

902 (E) ITC assays to test binding of cA<sub>3</sub> to T4-Acb2 D61R.

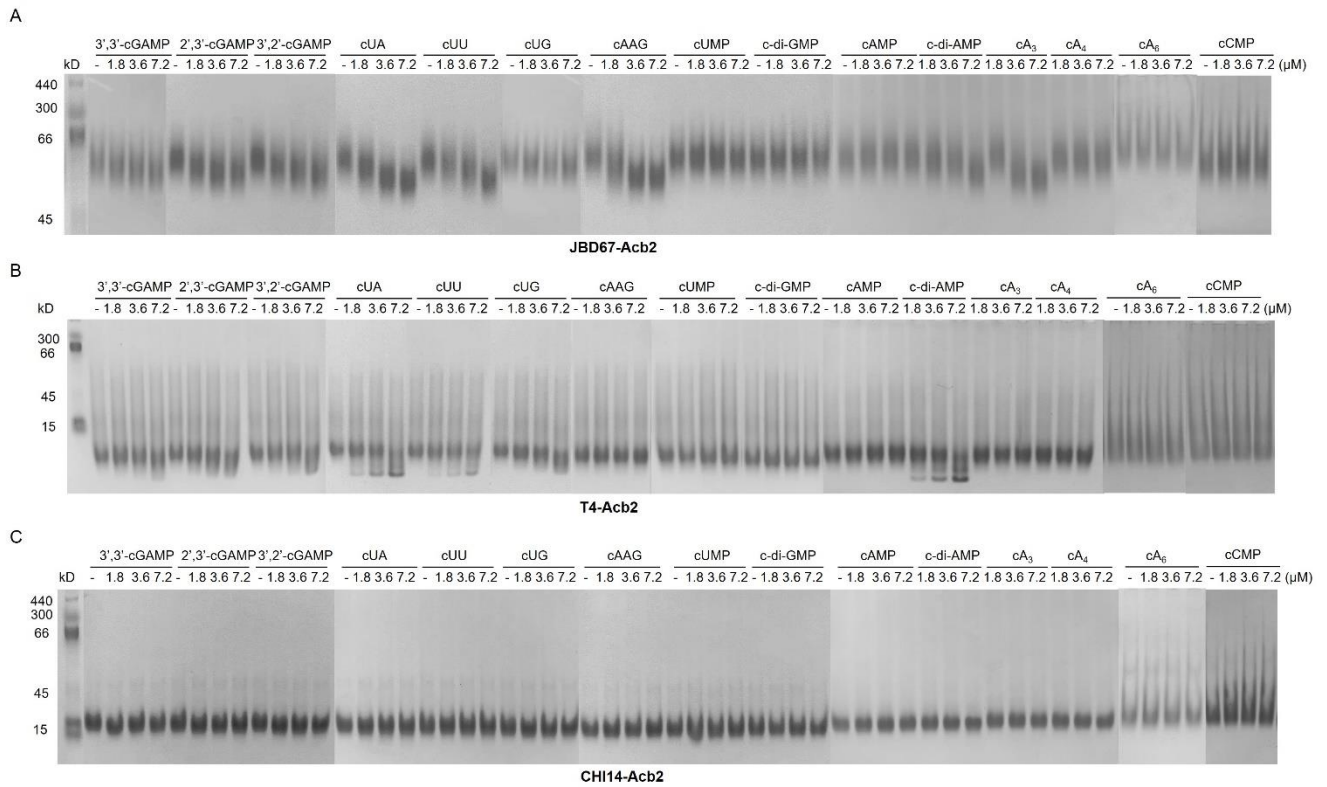

903

904 **Figure S8. The binding spectrums of Acb2 homologs studied by native PAGE, related to Figure**

905 **4**

906 (A-C) Native PAGE assay showed the binding of cyclic nucleotides to JBD67-Acb2, T4-Acb2 and

907 CHI14-Acb2. The proteins were incubated with small molecules at indicated concentrations. Then the

908 samples were subjected to native PAGE.

909

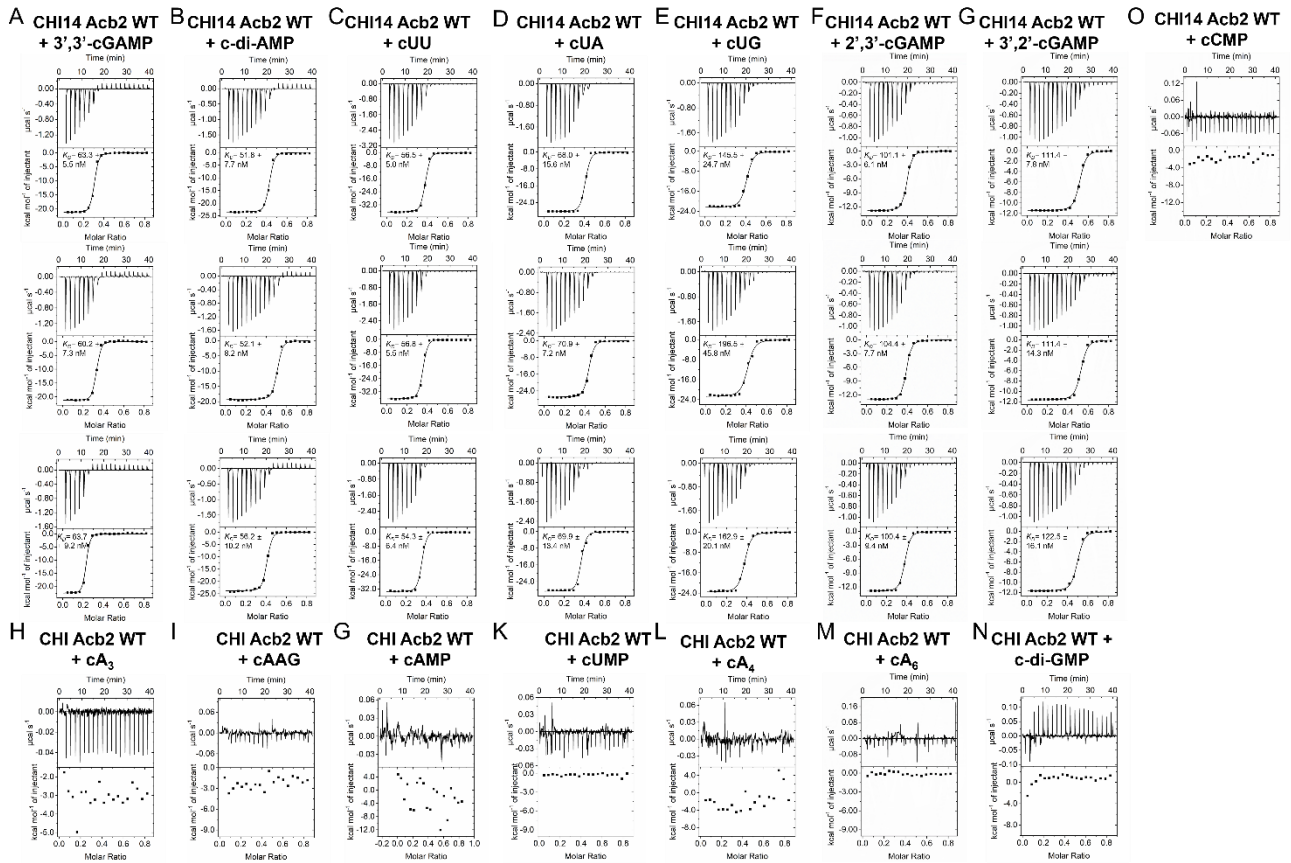

910

911 **Figure S9. The binding spectrum of CHI14-Acb2 studied by ITC assays, related to Figure 4**

912 (A-O) ITC assays to test binding of cyclic nucleotides to CHI14-Acb2.

913

914

915



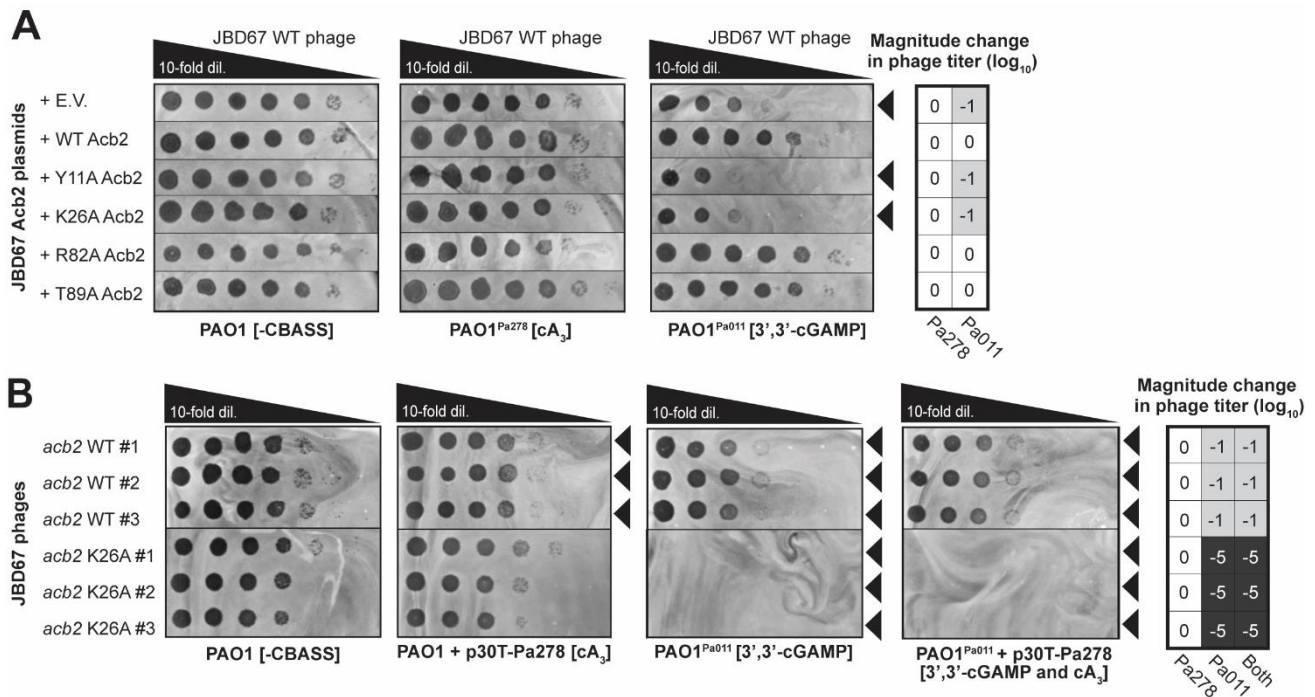

916

917

**Figure S10. Mutations in Acb2 binding residues differentially impacts phage titer related to**

918

**Figure 5. (A) Plaque assays with JBD67 WT phage spotted in 10-fold serial dilutions on PAO1 strains**

919

harboring an empty vector (E.V.) plasmid or JBD67 Acb2 variants. The PAO1 strains either contain no

920

CBASS operon (-CBASS), a chromosomally integrated Pa011 CBASS operon (PAO1<sup>Pa011</sup>), or a

921

chromosomally integrated Pa278 CBASS operon (PAO1<sup>Pa278</sup>). These plaque assays were used to

922

quantify the order of magnitude change in phage titer by comparing the number of spots (with plaques,

923

or clearings if plaques were not visible) on the PAO1<sup>Pa011</sup> or PAO1<sup>Pa278</sup> CBASS-expressing strains

924

divided by the PAO1 (-CBASS) strain (n=3). Basal expression of the Pa011 CBASS operon and

925

0.3mM IPTG-inducible expression of the Pa278 CBASS operon is sufficient for phage targeting. Black

926

arrowheads highlight significant CBASS-dependent reductions in phage titer. (B) Plaque assays with

927

JBD67 phages spotted in 10-fold serial dilutions on PAO1 strains with and without CBASS: PAO1 +

928

p30T-E.V. (-CBASS), PAO1 + p30T-Pa278, PAO1<sup>Pa011</sup> + p30T-E.V., PAO1<sup>Pa011</sup> + p30T-278. These

929

plaque assays were used to quantify the order of magnitude change in phage titer (n=3). Basal

930

expression of the Pa278 CBASS operon is sufficient for phage targeting. Black arrowheads highlight

931

significant CBASS-dependent reductions in phage titer.
